# Supplementary material
Source: PubMed Central journal article supplement (PMC2850016)
Supplement: pp.109.150458_1.pdf [file pp.109.150458_1.pdf]

**Table S1.** Significantly enriched consensus sequences in the promoter regions of At1g16300 (*GAPCp2*) and At1g79530 (*GAPCPI*). The analysis was done using the promoter tool (<http://www.bar.utoronto.ca/>)

| Gene      | Sequence | p-Values | Present in:                                                                                                                                            |
|-----------|----------|----------|--------------------------------------------------------------------------------------------------------------------------------------------------------|
| At1g16300 | AATC     | 0.034    | AGAMOUS                                                                                                                                                |
|           | ACAG     | 0.032    | AGAMOUS                                                                                                                                                |
|           | AGAA     | 0.017    | AGL2 (AGAMOUS-like 2)                                                                                                                                  |
|           | AGAG     | 0.032    | AGAMOUS                                                                                                                                                |
|           | AGCC     | 0.020    | AGL2 (AGAMOUS-like 2)                                                                                                                                  |
|           | ATCC     | 0.012    | AGAMOUS                                                                                                                                                |
|           | ATCG     | 0.024    | AGAMOUS                                                                                                                                                |
|           | CAGA     | 0.004    | Arabidopsis cab2 gene promoter,MYC recognition site found in the promoters of the dehydration-responsive gene rd22 and many other genes in Arabidopsis |
|           | CATC     | 0.020    | AGAMOUS                                                                                                                                                |
|           | CCAT     | 0.019    | AGAMOUS                                                                                                                                                |
|           | CGCG     | 0.035    | Arabidopsis histone H4                                                                                                                                 |
|           | CTGG     | 0.014    | AGAMOUS                                                                                                                                                |
|           | GAAG     | 0.030    | AGL2 (AGAMOUS-like 2)                                                                                                                                  |
|           | GACC     | 0.043    | AGL2 (AGAMOUS-like 2)                                                                                                                                  |
|           | GACG     | 0.020    | glutathione S-transferase gene (GST6)                                                                                                                  |
|           | GCCA     | 0.004    | AGAMOUS                                                                                                                                                |
|           | GGCC     | 0.007    | IDRS (Iron-Dependent Regulatory Sequence)                                                                                                              |
|           | GGCT     | 0.047    | glutathione S-transferase gene (GST6)                                                                                                                  |
|           | TCAG     | 0.043    | AGAMOUS                                                                                                                                                |
|           | TCCA     | 0.035    | AGAMOUS                                                                                                                                                |
| TGGC      | 0.021    | AGAMOUS  |                                                                                                                                                        |
| At1g79530 | CAGT     | 0.036    | ATMYB1 and ATMYB2, both isolated from Arabidopsis; ATMYB2 is involved in regulation of genes that are responsive to water stress                       |
|           | GGCC     | 0.019    | IDRS (Iron-Dependent Regulatory Sequence)                                                                                                              |
|           | GGGC     | 0.034    | glutathione S-transferase gene (GST6)                                                                                                                  |
|           | TTCC     | 0.017    | AGAMOUS                                                                                                                                                |

**Table S2.** Metabolite levels in flower buds of wild type (WT), *gapcp1gapcp2*, *gapcp1gapcp2* transformed with *GAPCp1* or *GAPCp2* cDNA under the control of the 35S promoter (*p35S::GAPCp1c*; *p35S::GAPCp2c*) and *gapcp1gapcp2* transformed with a genomic *GAPCp1* construct (*pGAPCp1::GAPCp1geno*).

Data are normalized to the mean response calculated for the WT. Values are represented as the mean  $\pm$  SE of seven to ten independent determinations from 3 different transgenic lines. Values in brackets are absolute values. Values in brackets are absolute values ( $\mu\text{mol g FW}^{-1}$ ). \* Absolute value not quantified. Those values that are significantly different to WT are set in bold type,  $p < 0.05$ . For simplicity *g* stands for *gapcp* and *G* stands for *GAPCp*.

|                                  | WT                      | <i>glg2</i>                       | <i>glg2</i><br><i>p35S::G1c</i>   | <i>glg2</i><br><i>p35S::G2c</i>   | <i>glg2</i><br><i>pG1::G1geno</i> |
|----------------------------------|-------------------------|-----------------------------------|-----------------------------------|-----------------------------------|-----------------------------------|
| <b>Amino acids</b>               |                         |                                   |                                   |                                   |                                   |
| Alanine, beta-                   | 1.00 $\pm$ 0.05 (0.11)  | <b>1.25 <math>\pm</math> 0.09</b> | 1.13 $\pm$ 0.05                   | 1.32 $\pm$ 0.15                   | 0.94 $\pm$ 0.07                   |
| Asparagine                       | 1.00 $\pm$ 0.32 (1.66)  | 0.64 $\pm$ 0.21                   | 0.78 $\pm$ 0.08                   | 0.70 $\pm$ 0.07                   | 0.94 $\pm$ 0.13                   |
| Glutamic acid                    | 1.00 $\pm$ 0.05 (4.75)  | 0.95 $\pm$ 0.06                   | <b>0.81 <math>\pm</math> 0.05</b> | 0.86 $\pm$ 0.07                   | 0.88 $\pm$ 0.07                   |
| Glutamine                        | 1.00 $\pm$ 0.17 (18.26) | 2.09 $\pm$ 0.78                   | <b>2.07 <math>\pm</math> 0.32</b> | <b>1.96 <math>\pm</math> 0.37</b> | 1.67 $\pm$ 0.32                   |
| Glycine                          | 1.00 $\pm$ 0.14 (1.23)  | 1.21 $\pm$ 0.19                   | 0.65 $\pm$ 0.19                   | 0.61 $\pm$ 0.22                   | 0.57 $\pm$ 0.20                   |
| Isoleucine                       | 1.00 $\pm$ 0.12 (0.13)  | <b>2.09 <math>\pm</math> 0.35</b> | 1.64 $\pm$ 0.28                   | <b>1.60 <math>\pm</math> 0.23</b> | 1.47 $\pm$ 0.20                   |
| Proline                          | 1.00 $\pm$ 0.09 (5.36)  | 1.20 $\pm$ 0.21                   | 1.30 $\pm$ 0.16                   | <b>1.66 <math>\pm</math> 0.22</b> | 1.39 $\pm$ 0.20                   |
| Serine                           | 1.00 $\pm$ 0.15 (2.49)  | 1.68 $\pm$ 0.30                   | <b>1.66 <math>\pm</math> 0.22</b> | <b>1.58 <math>\pm</math> 0.16</b> | 1.29 $\pm$ 0.14                   |
| Threonic acid                    | 1.00 $\pm$ 0.04 (0.15)  | 1.09 $\pm$ 0.04                   | 1.09 $\pm$ 0.06                   | <b>1.25 <math>\pm</math> 0.05</b> | 1.08 $\pm$ 0.03                   |
| Tryptophan                       | 1.00 $\pm$ 0.15 (0.03)  | <b>2.50 <math>\pm</math> 0.41</b> | <b>2.03 <math>\pm</math> 0.37</b> | <b>2.01 <math>\pm</math> 0.11</b> | <b>1.95 <math>\pm</math> 0.29</b> |
| <b>Organic acids</b>             |                         |                                   |                                   |                                   |                                   |
| Ascorbic acid                    | 1.00 $\pm$ 0.18 (0.01)  | 12.77 $\pm$ 5.58                  | 0.75 $\pm$ 0.17                   | 0.98 $\pm$ 0.12                   | 0.86 $\pm$ 0.28                   |
| Aspartic acid                    | 1.00 $\pm$ 0.23 (3.86)  | 0.74 $\pm$ 0.13                   | 0.94 $\pm$ 0.07                   | 0.92 $\pm$ 0.05                   | 0.88 $\pm$ 0.05                   |
| Benzoic acid, 4-hydroxy-         | 1.00 $\pm$ 0.09 (*)     | 1.13 $\pm$ 0.10                   | 1.16 $\pm$ 0.05                   | 1.15 $\pm$ 0.06                   | 1.16 $\pm$ 0.07                   |
| Butyric acid, 4-amino-           | 1.00 $\pm$ 0.08 (1.11)  | 0.87 $\pm$ 0.15                   | 1.04 $\pm$ 0.16                   | 0.92 $\pm$ 0.18                   | 1.32 $\pm$ 0.28                   |
| Citric acid                      | 1.00 $\pm$ 0.03 (2.95)  | <b>1.22 <math>\pm</math> 0.07</b> | 0.95 $\pm$ 0.05                   | 1.07 $\pm$ 0.07                   | 0.98 $\pm$ 0.04                   |
| Dehydroascorbic acid             | 1.00 $\pm$ 0.16 (0.07)  | <b>2.34 <math>\pm</math> 0.38</b> | 0.94 $\pm$ 0.18                   | 0.95 $\pm$ 0.22                   | 0.88 $\pm$ 0.12                   |
| Fumaric acid                     | 1.00 $\pm$ 0.04 (4.61)  | 0.77 $\pm$ 0.12                   | <b>0.80 <math>\pm</math> 0.04</b> | 1.01 $\pm$ 0.09                   | 0.97 $\pm$ 0.04                   |
| Gluconic acid                    | 1.00 $\pm$ 0.07 (*)     | 1.20 $\pm$ 0.25                   | 0.86 $\pm$ 0.15                   | 1.20 $\pm$ 0.21                   | 0.80 $\pm$ 0.15                   |
| Glutaric acid, 2-oxo-            | 1.00 $\pm$ 0.05 (0.06)  | 1.09 $\pm$ 0.06                   | 1.17 $\pm$ 0.07                   | 1.13 $\pm$ 0.07                   | 1.11 $\pm$ 0.03                   |
| Glyceric acid,                   | 1.00 $\pm$ 0.09 (0.14)  | 1.24 $\pm$ 0.11                   | 1.10 $\pm$ 0.11                   | <b>1.30 <math>\pm</math> 0.07</b> | <b>1.60 <math>\pm</math> 0.05</b> |
| Isocitric acid                   | 1.00 $\pm$ 0.03 (2.84)  | 1.03 $\pm$ 0.11                   | 1.09 $\pm$ 0.12                   | 0.96 $\pm$ 0.12                   | 0.91 $\pm$ 0.11                   |
| Malic acid                       | 1.00 $\pm$ 0.03 (12.49) | 1.12 $\pm$ 0.06                   | <b>0.91 <math>\pm</math> 0.03</b> | 1.01 $\pm$ 0.06                   | 0.99 $\pm$ 0.04                   |
| Nicotinic acid                   | 1.00 $\pm$ 0.05 (0.04)  | 1.13 $\pm$ 0.13                   | 1.06 $\pm$ 0.08                   | 1.21 $\pm$ 0.11                   | <b>1.21 <math>\pm</math> 0.08</b> |
| Octadecanoic acid                | 1.00 $\pm$ 0.03 (*)     | 1.25 $\pm$ 0.15                   | 0.98 $\pm$ 0.07                   | 1.02 $\pm$ 0.09                   | 0.99 $\pm$ 0.05                   |
| Succinic acid                    | 1.00 $\pm$ 0.06 (1.45)  | 1.17 $\pm$ 0.15                   | 0.96 $\pm$ 0.08                   | 1.14 $\pm$ 0.06                   | 0.98 $\pm$ 0.02                   |
| <b>Sugars and sugar alcohols</b> |                         |                                   |                                   |                                   |                                   |
| Cellobiose                       | 1.00 $\pm$ 0.09 (*)     | <b>2.53 <math>\pm</math> 0.48</b> | <b>1.69 <math>\pm</math> 0.14</b> | <b>1.79 <math>\pm</math> 0.25</b> | <b>1.66 <math>\pm</math> 0.16</b> |
| Erythritol                       | 1.00 $\pm$ 0.05 (*)     | 1.00 $\pm$ 0.09                   | 1.00 $\pm$ 0.05                   | 1.04 $\pm$ 0.02                   | 1.03 $\pm$ 0.04                   |
| Fructosa                         | 1.00 $\pm$ 0.05 (1.79)  | 1.02 $\pm$ 0.06                   | 1.02 $\pm$ 0.07                   | <b>1.21 <math>\pm</math> 0.08</b> | <b>1.56 <math>\pm</math> 0.11</b> |
| Glucosa                          | 1.00 $\pm$ 0.04 (2.90)  | 1.50 $\pm$ 0.30                   | 1.11 $\pm$ 0.07                   | <b>1.32 <math>\pm</math> 0.07</b> | <b>1.38 <math>\pm</math> 0.10</b> |
| Inositol, myo-                   | 1.00 $\pm$ 0.04 (0.96)  | <b>2.05 <math>\pm</math> 0.25</b> | <b>1.48 <math>\pm</math> 0.10</b> | <b>1.78 <math>\pm</math> 0.11</b> | <b>1.21 <math>\pm</math> 0.07</b> |
| Rafinose                         | 1.00 $\pm$ 0.00 (0.01)  | <b>6.50 <math>\pm</math> 0.85</b> | <b>2.03 <math>\pm</math> 0.04</b> | <b>4.72 <math>\pm</math> 0.09</b> | <b>1.76 <math>\pm</math> 0.03</b> |
| Sucrose                          | 1.00 $\pm$ 0.04 (5.25)  | <b>1.14 <math>\pm</math> 0.05</b> | 1.14 $\pm$ 0.10                   | 1.04 $\pm$ 0.09                   | 0.96 $\pm$ 0.04                   |
| Trehalose                        | 1.00 $\pm$ 0.09 (0.16)  | <b>4.68 <math>\pm</math> 0.45</b> | <b>2.64 <math>\pm</math> 0.26</b> | <b>3.92 <math>\pm</math> 0.55</b> | <b>1.37 <math>\pm</math> 0.05</b> |
| Xylose                           | 1.00 $\pm$ 0.09 (0.08)  | 0.99 $\pm$ 0.07                   | 1.05 $\pm$ 0.09                   | 1.03 $\pm$ 0.05                   | <b>1.30 <math>\pm</math> 0.04</b> |
| <b>Other metabolites</b>         |                         |                                   |                                   |                                   |                                   |

|                      |                     |                    |                    |                    |                    |
|----------------------|---------------------|--------------------|--------------------|--------------------|--------------------|
| Fructose-6-phosphate | 1.00 ± 0.06 (0.01)  | 0.96 ± 0.16        | 1.04 ± 0.06        | 1.03 ± 0.05        | 1.10 ± 0.04        |
| Glucose-6-phosphate  | 1.00 ± 0.07 (0.01)  | 0.89 ± 0.14        | 1.03 ± 0.05        | 1.00 ± 0.03        | 1.06 ± 0.04        |
| Glycerol             | 1.00 ± 0.03 (3.98)  | 1.03 ± 0.11        | 1.15 ± 0.05        | 1.15 ± 0.10        | 1.24 ± 0.13        |
| Glycerol-3-phosphate | 1.00 ± 0.04 (*)     | 1.29 ± 0.21        | 1.07 ± 0.09        | 1.25 ± 0.11        | 1.16 ± 0.07        |
| Phosphoric acid      | 1.00 ± 0.06 (36.14) | 0.87 ± 0.12        | <b>1.47 ± 0.07</b> | <b>1.51 ± 0.07</b> | <b>1.48 ± 0.11</b> |
| Putrescine           | 1.00 ± 0.09 (0.01)  | 1.66 ± 0.44        | 1.00 ± 0.14        | 0.89 ± 0.16        | 0.77 ± 0.13        |
| Tyramine             | 1.00 ± 0.02 (*)     | <b>1.20 ± 0.03</b> | 1.21 ± 0.05        | 1.19 ± 0.09        | 0.88 ± 0.07        |

---

**Table S3.** Primers used in this work

| gene                                         | Primer Name           | Sequence                                         |
|----------------------------------------------|-----------------------|--------------------------------------------------|
| <b>Primers for Mutant genotyping</b>         |                       |                                                  |
| At1g16300(GAPCp2)                            | LP3                   | TCTTCCAATTCGACCAAACC                             |
| At1g16300(GAPCp2)                            | RP3                   | TCCTCGTGTGCGAGCTTTATCC                           |
| At1g79530(GAPCp1)                            | At1g79530FBProm       | GGCTTATCGGGTTATGCCAATCAGGG                       |
| At1g79530(GAPCp1)                            | At1g79530R3Ex         | CGAACTGCAGATGGCACTTCTGTAGCCG                     |
| At1g79530(GAPCp1)                            | LP1                   | TTCGTTTCTGATTCTCTTGCG                            |
| At1g79530(GAPCp1)                            | RP1                   | TCATCCCTTGATGTTGCAATG                            |
| T-DNA SAIL                                   | LB1_SAIL              | GCCTTTTCAGAAATGGATAAATAGCCTTGCTTCC               |
| T-DNA Salk                                   | LBa1                  | TGGTTCACGTAGTGGGCCATCG                           |
| <b>Primers for Cloning</b>                   |                       |                                                  |
| At1g79530(GAPCp1)                            | PromAt1g79530FHindIII | CCCCAAGCTTCCGAGCTGTGTCAAACCTGATTCATGG            |
| At1g79530(GAPCp1)                            | PromAt1g79530RXhoI    | CCGCTCGAGGATTCGGAAGTGGGAGAAACAAAAG               |
| <b>Primers for site directed mutagenesis</b> |                       |                                                  |
| At1g79530(GAPCp1)                            | GAPCp1.C236G.F        | GATATAGTCTCCAATGCAAGTGGTACCACCAATTGTCTTGC        |
| At1g79530(GAPCp1)                            | GAPCp1.C236G.R        | GCAAGACAATTGGTGGTACCCTTGCATTGGAGACTATATC         |
| At1g79530(GAPCp1)                            | GAPCp1.H263A.F        | GAAGGCTTGATGACAACCTGTCGCTGCAACTACAGCTACTCAGAAAAC |
| At1g79530(GAPCp1)                            | GAPCp1.H263A.R        | GTTTTCTGAGTAGCTGTAGTTGCAGCGACAGTTGTCATCAAGCCTTC  |
| At1g79530(GAPCp1)                            | GAPCp1.K311A.F        | GTTCTTCCAGAACTGAATGGGGCTTTACGGGAATGGCCTTCCG      |
| At1g79530(GAPCp1)                            | GAPCp1.K311A.R        | CGGAAGGCCATTCCCGTAAGAGCCCCATTTCAGTTCTGGAAGAAC    |
| At1g79530(GAPCp1)                            | GAPCp1.R318E.F        | GAAACTTACGGGAATGGCCTTCGAGGTACCAACATCGAATGTTTCTG  |
| At1g79530(GAPCp1)                            | GAPCp1.R318E.R        | CAGAAACATTTCGATGTTGGTACCTCGAAGGCCATTCCCGTAAGTTTC |
| <b>Primers for Q-RT-PCR</b>                  |                       |                                                  |
| At1g13440(GAPC2)                             | JFRTQ                 | GTCACTGTTTTTCGGCATCAGGAACC                       |
| At1g13440(GAPC2)                             | JRRTQ                 | AGTCCCTCAACAATGCCAAACCTG                         |
| At1g16300(GAPCp2)                            | OL                    | TCTTCCAATTCGACCAAACC                             |
| At1g16300(GAPCp2)                            | OR                    | TCCTCGTGTGCGAGCTTTATCC                           |
| At1g79530(GAPCp1)                            | Q1F                   | GTCGCAACCTGAAGCCATCAAG                           |
| At1g79530(GAPCp1)                            | QR                    | TCATCCCTTGATGTTGCAATG                            |
| At3g04120(GAPC1)                             | AFRTQ                 | CCTACGATGAAATCAAAAAGGCTAT                        |
| At3g04120(GAPC1)                             | ARRTQ                 | GACATGTGGACGATCAAGTCCG                           |
| At3g51590(LPT12)                             | At3g51590 For         | GTGAGTGCCTTAAACTAGCGGG                           |
| At3g51590(LPT12)                             | At3g51590 Rev         | TCACACGGCAGTCGATATACTG                           |
| At4g21330(DYT1)                              | At4g21330 For         | CGGATCCAATGATAAAACCTGAAG                         |
| At4g21330(DYT1)                              | At4g21330 Rev         | GATCCCATCTCTTCTCTGTTATG                          |
| At4g28395(ATA7)                              | At4g28395 For         | GTCTGTGCATTGAGATAATGGGA                          |
| At4g28395(ATA7)                              | At4g28395 Rev         | CAACGTCGGGATTCTTGGTG                             |
| At4g37900(GRP)                               | At4g37900 For         | CAACATCCTTATGGTAAAGCTGTGG                        |
| At4g37900(GRP)                               | At4g37900 Rev         | CGGCTGCACTAAAGCCTTCC                             |
| At5g22260(MS1)                               | At5g22260 For         | CCGACTTAACCGGTCATCAGG                            |
| At5g22260(MS1)                               | At5g22260 Rev         | GCTACCCCATGCAGCAGCC                              |
| <b>Standards for Q-RT-PCR</b>                |                       |                                                  |
| At1g13320                                    | At1g13320 For         | ACCTGCGGTAATAACTGCATCTA                          |
| At1g13320                                    | At1g13320 Rev         | CCGAACATCAACATCTGGGTC                            |
| At5g15710                                    | At5g15710 For         | CTGCTTTACGTCTTGGAATCAAG                          |

At5g15710  
At5g55840  
At5g55840

At5g15710 Rev  
At5g55840 For  
At5g55840 Rev

GGACAGATGCATCAAATCTTGG  
GATGATATTGCAGTTTGTACCGT  
CACTGTCTTGCTTGTCTTGTCTG

At1g79530 (GAPCp1) : MAPSSLLRSAASYTVAAPRPDPFSSPASDHSKVLSSLGFSRNLKPSRFSSGSISSLQNGNARSVQPIKATATEVP-----SAVRRSSSSGKTKVGINC : 93  
 At1g16300 (GAPCp2) : MALSSLLRBAAT-SAAAPRVELVYSSSYLNHSQVTSSLGESHSLTSSRFSS-GAAVSTGKYNAKRVPQIKATATEAP-----PAVHRSRSSGKTKVGINC :  
 At1g13440 (GAPC1) : -----MADKIRIRIGINC :  
 At3g04120 (GAPC2) : -----MADKIRIRIGINC :  
 At1g12900 (GAP1) : -----MAS-ATFSVAKPSLQGFSEFSGLNR-SSA-LPPAKRSSDD-EFVSVFVSFQTSAMRNSGGYR-----KGVTEARLKVAINC :  
 At3g26650 (GAP2) : -----RPMGAS-VTFSVPK-----GFTFSEGLRS-SSASLPPGKLLSSD-EFVSVFVSFQTSAMGSSGGYR-----KGVTEARLKVAINC :  
 At1g42970 (GAPB) : -----MATHAALAVSR-----IPVTQRLOS-KSAIHSFPAQCSSKRLEVAEFSGLRMSIGGEASFDDAVAAQIIPKAVTSTTPVRGETVALKLVAINC :

At1g79530 (GAPCp1) : FGRIGRLVLRVIATSRD--IEVVAVMLPFIDAKYMAFMLKYDSTHNFKG-SINVIDDSTLEINGKVNVSFKDSEIPWADLGAAYVVESSVFTTLS : 190  
 At1g16300 (GAPCp2) : FGRIGRLVLRVIATSRD--IEVVAVMLPFIDAKYMAFMLKYDSTHNYKG-TINVIDDSTLEINGKQVKVSKRDBAEIPWADLGAAYVVESSVFTTVG :  
 At1g13440 (GAPC1) : FGRIGRLVARVVLQRD--VELVAVMLPFITTEYMTYMFKYDSTVHHQWKKHELKVVDKDTLLFGEKPVTFVGRINREDIPWAGASDFVVESTGVFTDKD :  
 At3g04120 (GAPC2) : FGRIGRLVARVVLQRD--VELVAVMLPFITTEYMTYMFKYDSTVHHQWKKHELKIKDEKTLFGEKPVTFVGRINREDIPWAGASADYVVESTGVFTDKD :  
 At1g12900 (GAP1) : FGRIGRNFLRCWHGRKDSPLDVIIVNL-TGGVQKASHLLKYDSTLHIFDA-DVKPSGDSALSVDGKIIKIVSDRNSNLWKGELGIDLIIEGTGVFVDRD :  
 At3g26650 (GAP2) : FGRIGRNFLRCWHGRKDSPLDIITAINL-TGGVQKASHLLKYDSTLHIFDA-DVKPSGETAISVDGKIIQVVSNSNLSLWKGELGIDLIIEGTGVFVDRD :  
 At1g42970 (GAPB) : FGRIGRNFLRCWHGRKDSPLLEVVLNL-SGGVKNASHLLKYDSTMLTFFKA-EVKIVDNETISVDGKILIKVVSNDLKLWAGELGIDLIIEGTGVFVDRD :

At1g79530 (GAPCp1) : KKAASHLKGGAKKVIITAPSAD--APMFVVGVEHETQPNDLIVSNASCTTNCLAFIAKVVHEEFGILEGLMTTVAATATQKTVGSPSMKDWRRGGAS : 287  
 At1g16300 (GAPCp2) : QSSHLKGGAKKVIITAPSAD--APMFVVGVEHETKPSNDLIVSNASCTTNCLAFIAKVVHEEFGILEGLMTTVAATATQKTVGSPSMKDWRRGGAS :  
 At1g13440 (GAPC1) : KKAASHLKGGAKKVIITAPSAD--APMFVVGVEHETKSLDNLIVSNASCTTNCLAFIAKVINDRFGIVEGLMTTVAASITATQKTVGSPSMKDWRRGGAS :  
 At3g04120 (GAPC2) : KKAASHLKGGAKKVIITAPSAD--APMFVVGVEHETKSLDNLIVSNASCTTNCLAFIAKVINDRFGIVEGLMTTVAASITATQKTVGSPSMKDWRRGGAS :  
 At1g12900 (GAP1) : GAGKHLQAGAKKVIITAPCKG-DIFTYVVGVAELKSHEDLIVSNASCTTNCLAFIVKVLDDQKFGIIKATMTTTHSYGDRLLD-ASHRDLRRAAAA :  
 At3g26650 (GAP2) : GAGKHLQAGAKKVIITAPCKG-DIFTYVVGVAELKSHDEPLIVSNASCTTNCLAFIVKVLDDQKFGIIKATMTTTHSYGDRLLD-ASHRDLRRAAAA :  
 At1g42970 (GAPB) : GAGKHLQAGAKKVIITAPKAGDIFTYVVGVEHEDGHVAVLIVSNASCTTNCLAFIAKVLDEEFGIVKATMTTTHSYGDRLLD-ASHRDLRRAAAA :

At1g79530 (GAPCp1) : QNIISSSTGAAKAVGKVLPELNKMLTGMARVPTPNVSVVDDITCRLEK-ASYEDVKAIFKHASGGLKGIIGYTEDDVSNDPVGDSRSIFDANAGIG : 386  
 At1g16300 (GAPCp2) : QNIISSSTGAAKAVGKVLPELNKMLTGMARVPTPNVSVVDDITCRLEK-ASYEDVKAIFKFAEGPLRIGLYTEEDVSNDPFLGDSRSIFDANAGIG :  
 At1g13440 (GAPC1) : FNIISSSTGAAKAVGKVLPELNKMLTGMSEFVPTVDVSVVDDITVRLKA-ATYDEIKKAIKEESGKMLKGIIGYTEDDVSDFVGDNRSIFDAKAGIA :  
 At3g04120 (GAPC2) : FNIISSSTGAAKAVGKVLPELNKMLTGMSEFVPTVDVSVVDDITVRLKA-ATYDEIKKAIKEESGKMLKGIIGYTEDDVSDFVGDNRSIFDAKAGIA :  
 At1g12900 (GAP1) : LNIVPTSTGAAKAVLVLNPKKMLNGIALRVPTPNVSVVDDIVVQVSKK-TFAEENVAFRDAAEKELKGIIDVCDPELVSDFRCSDDVSTTISSLTMV :  
 At3g26650 (GAP2) : LNIVPTSTGAAKAVLVLNPKKMLNGIALRVPTPNVSVVDDIVVQVSKK-TFAEENVAFRDAAEKELKGIIDVCDPELVSDFRCSDDVSTTISSLTMV :  
 At1g42970 (GAPB) : LNIVPTSTGAAKAVLVLNPKKMLNGIALRVPTPNVSVVDDIVINVEKKGKLTAEVDNEFRKAAANGPMKGIIDVCDAPLVSDFRCSDDVSTTISSLTMV :

At1g79530 (GAPCp1) : LSKSFVRLVSYDNEWGYSNRLLDIEHMALVAASH----- : 422  
 At1g16300 (GAPCp2) : LSKSFMLVSYDNEWGYSNRLLDIEHMALVAASR----- :  
 At1g13440 (GAPC1) : LSDKFRVRLVSYDNEWGYSNRVVDLIVHMSKA----- :  
 At3g04120 (GAPC2) : LSDKFRVRLVSYDNEWGYSNRVVDLIVHMSKA----- :  
 At1g12900 (GAP1) : MGDDMRVVIANVDNEWGYSQRVVDLADIVANNWK----- :  
 At3g26650 (GAP2) : MGDDMRVVIANVDNEWGYSQRVVDLADIVANNWK----- :  
 At1g42970 (GAPB) : MGDDMRVVIANVDNEWGYSQRVVDLADIVANNWK----- :  
 At1g42970 (GAPB) : MGDDMRVVIANVDNEWGYSQRVVDLADIVANNWK----- :  
 At1g42970 (GAPB) : MGDDMRVVIANVDNEWGYSQRVVDLADIVANNWK----- :

Supplemental Figure 1. Amino acid alignment of GAPCps with other members of the GAPDH family in Arabidopsis.
